# Supplementary material for: Health Resource and Cost Savings Achieved in a Multidisciplinary Lung Cancer Clinic
Source: MDPI journal article supplement (doi:10.3390/curroncol28030157), 2021-04-29
Supplement: s1 [file s1]

**Table S1.** Variable Definitions.

| Cost Category                          | Definition                                                                                               |
|----------------------------------------|----------------------------------------------------------------------------------------------------------|
| Travel Distance                        | Round trip from patient's home to Hotel Dieu Hospital, Kingston, Ontario                                 |
| <b>Patient Expenses</b>                |                                                                                                          |
| Travel Cost                            | Cost per kilometre                                                                                       |
| Travel Time                            | Distance travelled/speed of travel                                                                       |
| Wage                                   | Average hourly wage in 2019 for Canadians over the age of 25                                             |
| Oncology Clinic Appointment Duration   | Registration time and physician meeting duration                                                         |
| Time Spent Locating Clinic             | Walking to clinic from parking location                                                                  |
| Productivity Loss                      | Average Oncology Clinic Appointment Duration + Time Spent Locating Clinic + Parking Time + Travel Time   |
| Patient Cost of Productivity Loss      | Hours of productivity lost multiplied by wage, excluding any person over the age of 65                   |
| Caregiver Cost of Productivity Loss    | Hours of productivity lost multiplied by wage, assuming employment of 50% (25–75%) of caregivers present |
| Parking Time                           | Average Oncology Clinic Appointment Duration + Time Spent Locating Clinic                                |
| Parking Cost                           | Cost per hour, average appointment duration and time spent locating the clinic                           |
| Total Patient Expenses (<65 years old) | Travel Cost + Cost of Productivity Loss + Parking Cost                                                   |
| Total Patient Expenses (>65 years old) | Travel Cost + Parking Cost                                                                               |
| <b>Clinic Visit Expenses</b>           |                                                                                                          |
| Administrative Assistant Base Wage     | Average hourly wage in 2019 for administrative assistants                                                |
| Administrative Assistant Benefits      | Benefits                                                                                                 |
| Administrative Assistant Total Wage    | Hourly base wage + benefits                                                                              |
| Appointment Booking Time               | Time to book one appointment for one patient                                                             |
| Cost Per Patient                       | The cost of booking one appointment for one patient                                                      |

**Table S2.** Cost and Time Estimates per Oncology visit.

| Variable                                       | Value        | Notes                                                                                                                  |
|------------------------------------------------|--------------|------------------------------------------------------------------------------------------------------------------------|
| Patient Visits Saved                           | 371          | (2.69–1.62) X 350 patients                                                                                             |
| Caregivers Visits Saved                        | 464          | 371 patient visits X 1.25 caregivers/patients/visit                                                                    |
| Return Travel Distance                         | 101.96 km    | Calculated mean two-way distance per patient using available data                                                      |
| Caregiver Productivity Loss                    | 50%          | 50% in base case, 25% best case, 75% worst case                                                                        |
| <b>Out of Pocket and Productivity Expenses</b> |              |                                                                                                                        |
| Travel Cost                                    | \$0.58/km    | \$0.58/km; \$0.58 X 101.96 km = \$59.14 per visit<br>Based on 2019 automobile allowance rates[26]                      |
| Travel Time                                    | 61.2 min     | Estimated: 100km/h average speed and mean distance of 101.96 km                                                        |
| Wage Loss                                      | \$29.55/hour | 2019 average hourly wage for Canadians over 25[28]                                                                     |
| Oncology Clinic Visit Duration                 | 75.60 min    | As per Gao et al.[29]                                                                                                  |
| Time Spent Locating Clinic                     | 15 min       | Estimated                                                                                                              |
| Total Time Lost Per Visit                      | 2.53 h       | Average Oncology Clinic Appointment Duration (75.6 min) + Time Spent Locating Clinic (15 min) + Travel Time (61.2 min) |

|                                     |              |                                                                        |
|-------------------------------------|--------------|------------------------------------------------------------------------|
| Cost of Productivity Loss per Visit | \$74.76      | Productivity loss at a rate of \$29.55/hr for 2.53 h of lost time      |
| Parking Cost                        | \$6.00       | KHSC parking rate, \$3.00/hr X 2 h parking/average visit               |
| <b>Clinic Visit Expenses</b>        |              |                                                                        |
| Administrative Assistant Base Wage  | \$21.85/hour | Wage range \$20.25-\$23.47; average used                               |
| Administrative Assistant Benefits   | \$5.47       | 25% of base wage                                                       |
| Administrative Assistant Total Wage | \$27.33/hour | Average Base wage (\$21.85) + Benefits (\$5.47)                        |
| Appointment Booking Time            | 3 min        | Estimated time taken to book one appointment using available data      |
| Cost Per Appointment Booking        | \$1.37       | Calculated using hourly total wage and 3 min taken to book appointment |

Abbreviations: \$, 2019 CAD.

**Table S3:** Economic benefits of MDC versus traditional model of care, sensitivity analysis.

| Variable                                                                | Best Case    | Worst Case |
|-------------------------------------------------------------------------|--------------|------------|
| Patient Visits Saved [ $n = 350$ ]                                      | 371          | 371        |
| Caregiver Visits Saved [1.25 caregivers/patient visit]                  | 464          | 464        |
| Patients <65 years of age                                               | 23%          | 23%        |
| Parking Cost                                                            | \$4.50/visit | \$12/visit |
| Clinic Visit Duration                                                   | 0.93 h       | 1.58 h     |
| Time Forgone (return travel, parking, finding clinic)                   | 1.26 h       | 5.92 h     |
| Caregivers Incurring Productivity Loss                                  | 25%          | 75%        |
| <b>Out-of-Pocket Cost Savings</b>                                       |              |            |
| Parking Cost (cost/visit)                                               | \$1,670      | \$4,452    |
| Return Travel Cost (\$59.14/visit)                                      | \$21,941     | \$21,941   |
| <b>Total Out-of-Pocket Cost Savings</b>                                 | \$23,610     | \$26,393   |
| <b>Productivity Loss Savings</b>                                        |              |            |
| Patient Opportunity Cost (\$29.55/hour)                                 | \$5,535      | \$18,911   |
| Caregiver Opportunity Cost (\$29.55/hour)                               | \$7,520      | \$77,084   |
| <b>Total Productivity Loss Savings</b>                                  | \$13,055     | \$95,995   |
| <b>Total Patient Out-of-Pocket Expenses + Productivity Loss Savings</b> | \$36,665     | \$122,388  |
| <b>Clinic Visit Cost</b>                                                |              |            |
| Cost for Time Spent Booking Appointments (\$1.37/visit)                 | \$508        | \$508      |
| <b>Total Personnel Cost Savings</b>                                     | \$508        | \$508      |
| <b>Total Savings</b>                                                    | \$37,173     | \$122,896  |

Abbreviations: \$, 2019 CAD.

**Table S4.** Cost and Time Estimates per EBUS-TBNA Procedure.

| Variable                                                  | Value     | Notes                                                             |
|-----------------------------------------------------------|-----------|-------------------------------------------------------------------|
| Return Travel Distance                                    | 101.96 km | Calculated mean two-way distance per patient using available data |
| Caregiver Productivity Loss                               | 50%       | 50%                                                               |
| <b>EBUS-TBNA, Out of Pocket and Productivity Expenses</b> |           |                                                                   |

|                                     |              |                                                                                                                                                               |
|-------------------------------------|--------------|---------------------------------------------------------------------------------------------------------------------------------------------------------------|
| EBUS-TBNA Procedure Cost            | \$1,577*     | Per Czarnecka-Kujawa et al.[38]                                                                                                                               |
| Travel Cost                         | \$0.58/km    | \$0.58/km: \$0.58 X 101.96 km = \$59.14 per visit                                                                                                             |
| Travel Time                         | 61.2 min     | Based on 2019 automobile allowance rates[26]                                                                                                                  |
| Wage Loss                           | \$29.55/hour | Estimated: 100 km/h average speed and mean distance of 101.96 km                                                                                              |
| EBUS-TBNA Duration                  | 180 min      | 2019 average hourly wage for Canadians over 25[28]                                                                                                            |
| Total Time Lost Per EBUS-TBNA Visit | 7.5 h        | (Includes patient registration, preparation, and recovery)                                                                                                    |
| Cost of Productivity Loss per Visit | \$221.40     | We consider time lost to EBUS-TBNA Visit to be a full work day as patients are advised not to work after the procedure, and most patients take a full day off |
| Parking Cost                        | \$9.00       | Productivity loss at a rate of \$29.55/hr for 7.5 h of lost time                                                                                              |
|                                     |              | KHSC parking rate, \$3.00/hr X 3 h parking/average visit for an EBUS                                                                                          |

\* CAD 1,468 (2015) = CAD 1,577 (2019)

Abbreviations: \$, 2019 CAD.
